# Supplementary material for: Glycosaminoglycan-functionalized gold nanorods: interactions with cardiac cells and type I collagen
Source: Royal Society of Chemistry journal article supplement (doi:10.1039/b902760b), 2009-01-01
Supplement: b902760b.pdf [file b902760b.pdf]

### Supplementary Information

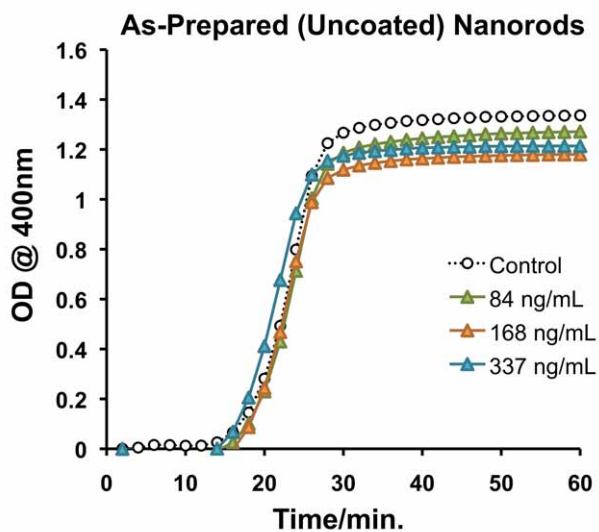

Figure S1. Type I collagen fibrillogenesis in the absence and presence of as-prepared gold nanorods. Data are means of two samples from 1 of 3 representative experiments.
